# Supplementary material for: Potentiation of tumor responses to DNA damaging therapy by the selective ATR inhibitor VX-970
Source: Oncotarget. 2014 Jul 3;5(14):5674–85. doi: 10.18632/oncotarget.2158 (PMC4170644; doi:10.18632/oncotarget.2158)
Supplement: Supplementary file 1 [file oncotarget-05-5674-s001.pdf]

## Potentialiation of tumor responses to DNA damaging therapy by the selective ATR inhibitor VX-970

### Supplementary Material

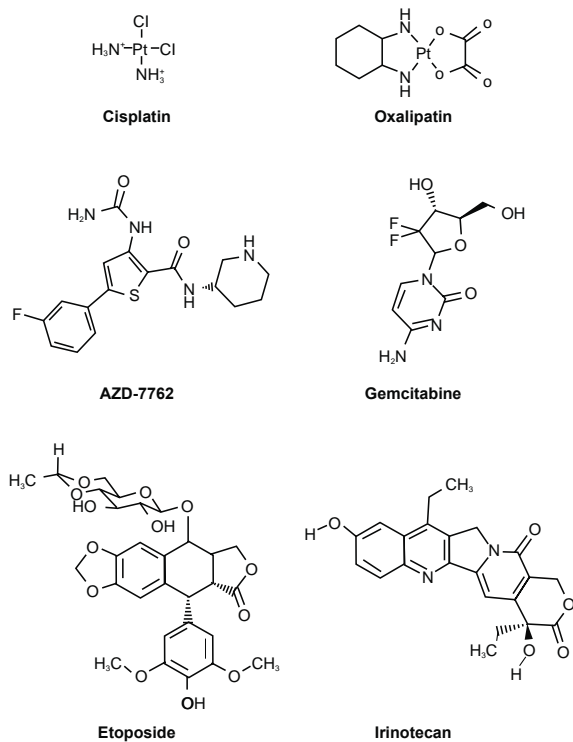

**Supplementary Figure 1: Chemical structures of AZD7762 (Chk1/2), oxaliplatin, cisplatin, irinotecan, gemcitabine and etoposide.**

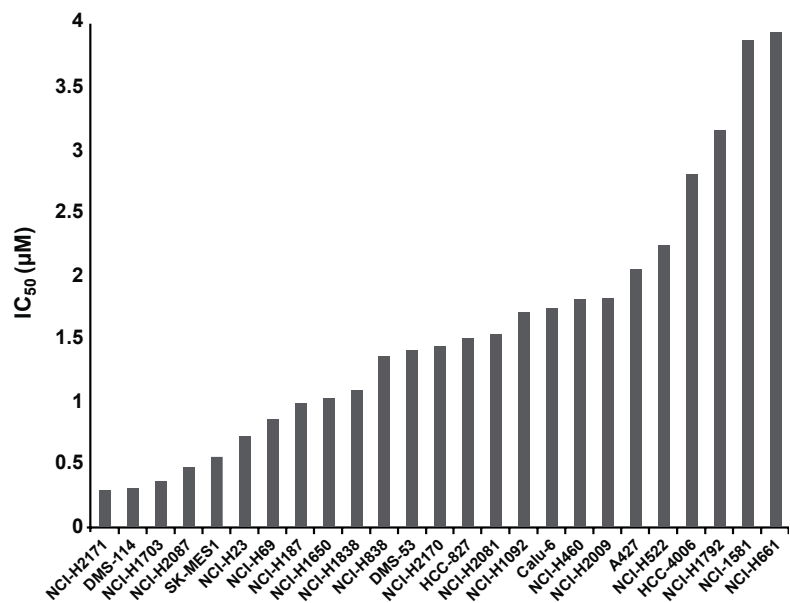

**Supplementary Figure 2: Single agent activity of VX-970 against a panel of lung cell lines.** IC<sub>50</sub> values of single agent VX-970 across a panel of lung cell lines determined using CellTiterGlo

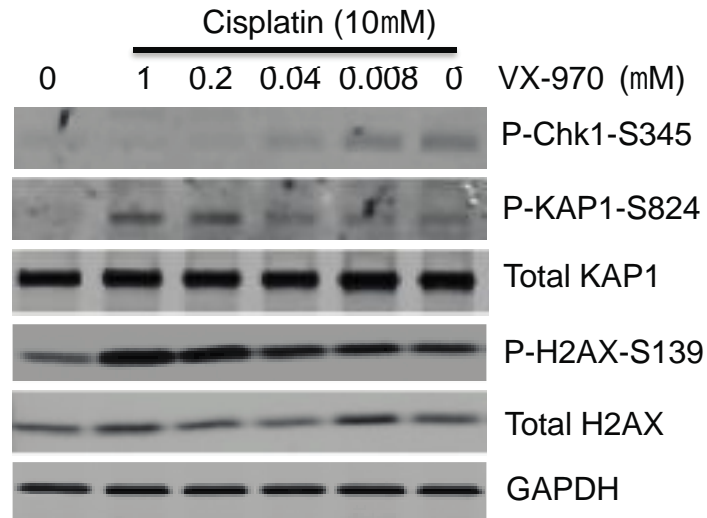

**Supplementary Figure 3: Impact of VX-970 and cisplatin treatment on markers of ATR activity and DNA damage in primary lung tumor cells.** Cells dissociated from tumor OD26749 were allowed to grow for 3 days and exposed in vitro to VX-970 (0, 0.008, 0.04, 0.2, 1  $\mu$ M) plus cisplatin (10  $\mu$ M). Extracts were prepared after 8 h of treatment and immunoblotted as indicated. GAPDH, glyceraldehyde 3-phosphate dehydrogenase.

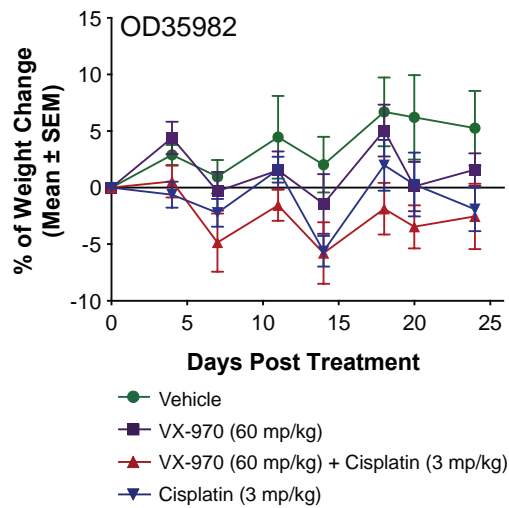

**Supplementary Figure 4: Effect of VX-970 and / or cisplatin on body weight in the OD35982 primary lung tumor xenograft model.** Mice bearing OD35982 tumors were treated with vehicle, VX-970 alone (30 mg/kg PO, 4 consecutive days a week), cisplatin alone (3 mg/kg, IP, q7d) and the combination, for three weeks. Cisplatin was administered 16 hours following the first dose of VX-970 of each cycle on Day 17, Day 24 and Day 31 after tumor implantation. Treatment was stopped on Day 34 post implantation. Mouse body weights were measured twice a week.

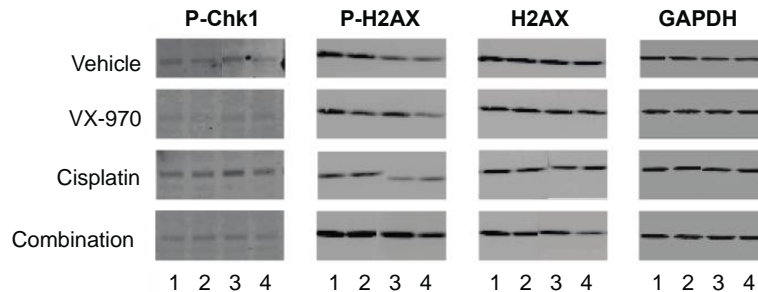

**Supplementary Figure 5: Western blots of markers of ATR activity and DNA damage from primary lung tumors taken from mice treated with VX-970 and / or cisplatin.** OD26749 tumors were harvested from four mice (1-4) dosed once with Vehicle, 60 mg/kg VX-970, 3 mg/kg cisplatin or combination after 4 h (P-Chk1) or 48 h (P-H2AX). Extracts were prepared and immunoblotted as indicated.

**Supplementary Table 1: Maximum shift in IC<sub>50</sub> values for various DNA damaging agents following cotreatment with VX-970 or AZD7762** IC<sub>50</sub> values for each agent were determined at 96 h by CellTiterGlo across a panel of lung cell lines. I Irinotecan, C Cisplatin, E etoposide, G gemcitabine, O Oxaliplatin

| Cell Line   | VX-970 |       |       |       |       | AZD-7762 |      |      |       |      |
|-------------|--------|-------|-------|-------|-------|----------|------|------|-------|------|
|             | I      | C     | E     | G     | O     | I        | C    | E    | G     | O    |
| A427        | 9.6    | 12.0  | 10.8  | 4.7   | 3.9   | 3.6      | 4.5  | 3.1  | 5.6   | 1.1  |
| A549        | -1.7   | 2.6   | -1.7  | 3.2   | -2.0  | -2.6     | 1.4  | 1.5  | 4.9   | -1.4 |
| A549_vector | -1.9   | 3.4   | -1.7  | 2.6   | -3.4  | 1.2      | -2.4 | 2.1  | 3.4   | -1.4 |
| A549_p53    | 5.0    | 10.5  | 5.6   | 6.2   | 1.9   | 1.8      | 2.9  | 1.7  | 6.2   | -1.1 |
| Calu-1      | 16.1   | 2.6   | 131.9 | 4.7   | 1.2   | 7.5      | 2.0  | 6.3  | 4.1   | NA   |
| Calu-6      | 15.5   | 4.9   | 14.1  | 8.2   | -4.1  | 17.6     | 1.4  | 12.0 | 8.2   | -1.7 |
| COR-L23     | 4.6    | 8.1   | 5.7   | 7.9   | -2.0  | 12.9     | 6.0  | 9.9  | 23.8  | 1.6  |
| DMS-53      | 1.2    | 4.8   | 1.8   | 2.0   | -1.9  | 2.6      | -1.5 | 2.6  | 2.3   | -3.2 |
| DMS-79      | -1.2   | 13.0  | -2.0  | 2.2   | 6.5   | -1.3     | -2.1 | -1.8 | 6.3   | -1.2 |
| EBC-1       | 1.2    | 18.1  | 1.1   | 2.3   | 3.5   | -2.9     | 1.5  | 1.2  | 3.6   | -1.2 |
| H1092       | 4.2    | 16.7  | 9.7   | 5.9   | 8.7   | 4.4      | 4.2  | 5.7  | 30.9  | 1.4  |
| H1155       | 1.3    | 29.9  | 2.9   | 8.3   | 12.9  | 6.6      | 2.6  | 5.5  | 10.7  | 2.4  |
| H1299       | 4.6    | 10.7  | 2.8   | 8.4   | -1.7  | 3.0      | 3.2  | 1.3  | 13.0  | 1.6  |
| H1581       | 8.1    | 16.8  | 7.0   | 9.5   | 5.7   | 6.6      | 3.2  | 2.7  | 12.5  | -3.8 |
| H1650       | -1.3   | 10.8  | 4.4   | 8.6   | 1.3   | 6.2      | 7.7  | 8.3  | 11.5  | -2.0 |
| H1651       | 2.0    | 7.8   | 1.9   | 6.7   | 4.0   | 1.9      | 3.7  | -3.4 | 6.2   | 2.3  |
| H1703       | -2.2   | 7.2   | 3.7   | 19.4  | 4.5   | -1.9     | 1.8  | -1.9 | 4.4   | -2.9 |
| H1792       | 9.0    | 14.6  | 3.7   | 2.8   | 2.0   | 3.6      | 4.9  | 3.2  | 7.1   | 1.3  |
| H187        | -2.2   | 3.3   | -2.1  | 5.4   | 127.1 | -1.5     | 2.1  | NA   | -1.3  | 2.2  |
| H1993       | -1.8   | 7.3   | NA    | 2.8   | -1.5  | -3.7     | 3.0  | NA   | 2.7   | -2.9 |
| H2009       | 3.4    | 10.4  | 2.0   | 9.6   | -2.0  | 3.4      | 4.6  | 16.5 | 18.6  | -1.6 |
| H2087       | 2.6    | 3.9   | 3.2   | 2.4   | -2.4  | 5.1      | 2.3  | 6.5  | 3.6   | -2.8 |
| H2170       | 1.7    | 24.3  | 2.1   | 4.8   | 3.2   | -2.7     | 4.5  | 2.1  | 5.0   | 1.3  |
| H2171       | 6.0    | 4.1   | 18.0  | 25.9  | 5.7   | 2.6      | 1.9  | 1.3  | 24.5  | 2.2  |
| H226        | 1.6    | 2.8   | -1.6  | 4.4   | -2.2  | 2.8      | -1.2 | 2.0  | 4.2   | NA   |
| H23         | 9.3    | 21.6  | 5.8   | 3.0   | 3.5   | 2.9      | 4.1  | -2.5 | 10.6  | -2.4 |
| H460        | 2.0    | 7.9   | -1.8  | 5.9   | -1.6  | -1.2     | -2.9 | -2.2 | 8.0   | -1.2 |
| H522        | 79.3   | 111.0 | 39.2  | 42.7  | 7.6   | 37.9     | 29.3 | 12.1 | 59.7  | 2.2  |
| H661        | 4.4    | 3.7   | 6.2   | 9.9   | 2.2   | 21.1     | 5.9  | 12.7 | 21.8  | 1.6  |
| H810        | 2.8    | 11.2  | 8.6   | 746.2 | 1.1   | 122.3    | 21.4 | 46.9 | 544.7 | NA   |
| H838        | 13.5   | 9.8   | 5.7   | 9.1   | 4.4   | 8.5      | 3.1  | 3.0  | 9.3   | 3.6  |
| HCC-4006    | 6.6    | 23.1  | NA    | 36.4  | 1.3   | 7.5      | 10.9 | NA   | 53.6  | 2.1  |
| HCC-827     | 5.0    | 7.2   | 3.0   | 9.2   | -1.7  | 6.2      | 4.9  | 2.1  | 13.2  | NA   |
| HFL1        | NA     | -1.3  | NA    | 4.1   | -1.3  | 2.4      | -1.2 | NA   | NA    | NA   |
| SK-MES1     | -4.1   | 1.5   | -1.6  | 2.9   | -1.6  | -2.6     | -1.5 | NA   | 1.2   | NA   |
| SW900       | -1.5   | 3.2   | -1.6  | 4.0   | -3.0  | -2.2     | -1.9 | 1.4  | 3.2   | -2.7 |

**Supplementary Table 2: p53 mutational status across a panel of lung cell lines.**  
**WT: wild-type. ND: not determined.**

| Cell line | Tissue Type             | <i>TP53</i> |
|-----------|-------------------------|-------------|
| A427      | Adenocarcinoma          | WT          |
| A549WT    | Adenocarcinoma          | WT          |
| Calu-1    | Squamous cell carcinoma | WT          |
| Calu-6    | Adenocarcinoma          | WT          |
| COR-L23   | Large cell carcinoma    | WT          |
| DMS-53    | Small cell carcinoma    | Mutant      |
| DMS-79    | Small cell carcinoma    | Mutant      |
| EBC-1     | Squamous cell carcinoma | ND          |
| H1092     | Small cell carcinoma    | WT          |
| H1155     | Large cell carcinoma    | Mutant      |
| H1299     | Large cell carcinoma    | Mutant      |
| H1581     | Large cell carcinoma    | WT          |
| H1650     | Adenocarcinoma          | Mutant      |
| H1651     | Adenocarcinoma          | Mutant      |
| H1703     | Adenocarcinoma          | Mutant      |
| H1792     | Adenocarcinoma          | Mutant      |
| H187      | Small cell carcinoma    | Mutant      |
| H1993     | Adenocarcinoma          | Mutant      |
| H2009     | Adenocarcinoma          | Mutant      |
| H2087     | Adenocarcinoma          | Mutant      |
| H2170     | Squamous cell carcinoma | WT          |
| H2171     | Small cell carcinoma    | Mutant      |
| H226      | Squamous cell carcinoma | WT          |
| H23       | Adenocarcinoma          | Mutant      |
| H460      | Large cell carcinoma    | WT          |
| H522      | Adenocarcinoma          | Mutant      |
| H661      | Large cell carcinoma    | Mutant      |
| H810      | Large cell carcinoma    | WT          |
| H838      | Adenocarcinoma          | WT          |
| HCC-4006  | Adenocarcinoma          | ND          |
| HCC-827   | Adenocarcinoma          | ND          |
| HFL1      | Normal                  | WT          |
| SK-MES1   | Squamous cell carcinoma | Mutant      |
| SW900     | Squamous cell carcinoma | Mutant      |

**Supplementary Table 3: Summary of human primary lung tumors used in this study.**

| Sample ID | Gender/Age | Pathology               | Grade                               | <i>TP53</i> Mutation |
|-----------|------------|-------------------------|-------------------------------------|----------------------|
| OD35982   | Unknown    | Squamous cell carcinoma | Poorly differentiated               | R110L                |
| OD29498   | F/56       | Adenocarcinoma          | Poorly differentiated               | Q136N                |
| OD26749   | M/66       | Adenocarcinoma          | Poorly differentiated               | N                    |
| OD26131   | M/67       | Squamous cell carcinoma | Poorly differentiated               | N                    |
| OD33966   | Unknown    | Adenocarcinoma          | Moderately to poorly differentiated | N                    |
| BDG121410 | M/55       | Squamous cell carcinoma | Poorly differentiated               | N                    |
| OD29607   | M/66       | Adenocarcinoma          | Poorly differentiated               | S127Y                |

**Supplementary Table 4: Maximum body weight loss from studies described in Figure 4.**

| Tumor     | Maximum Average % Body Weight Lost |        |                    |           |
|-----------|------------------------------------|--------|--------------------|-----------|
|           | Vehicle                            | VX-970 | VX-970 + Cisplatin | Cisplatin |
| OD35982   | Gain                               | -1.7   | -6.5               | -6.2      |
| OD29498   | -11.2                              | -6.5   | -11.6              | -4.8      |
| OD26749   | Gain                               | Gain   | -8.2               | -0.5      |
| OD26131   | Gain                               | Gain   | -5.4               | Gain      |
| OD33966   | -3.5                               | -4.1   | -8.5               | -6.0      |
| BDG121410 | Gain                               | -4.8   | -4.4               | -5.9      |
| OD29607   | -1.2                               | -2.5   | -3.5               | -2.6      |
